# Supplementary material for: Nav1.6 promotes inflammation and neuronal degeneration in a mouse model of multiple sclerosis
Source: Springer Nature journal article supplement (doi:10.1186/s12974-019-1622-1), 2019-11-13

ALRASHDI ET AL. - SUPPLEMENTARY FIGURE 1

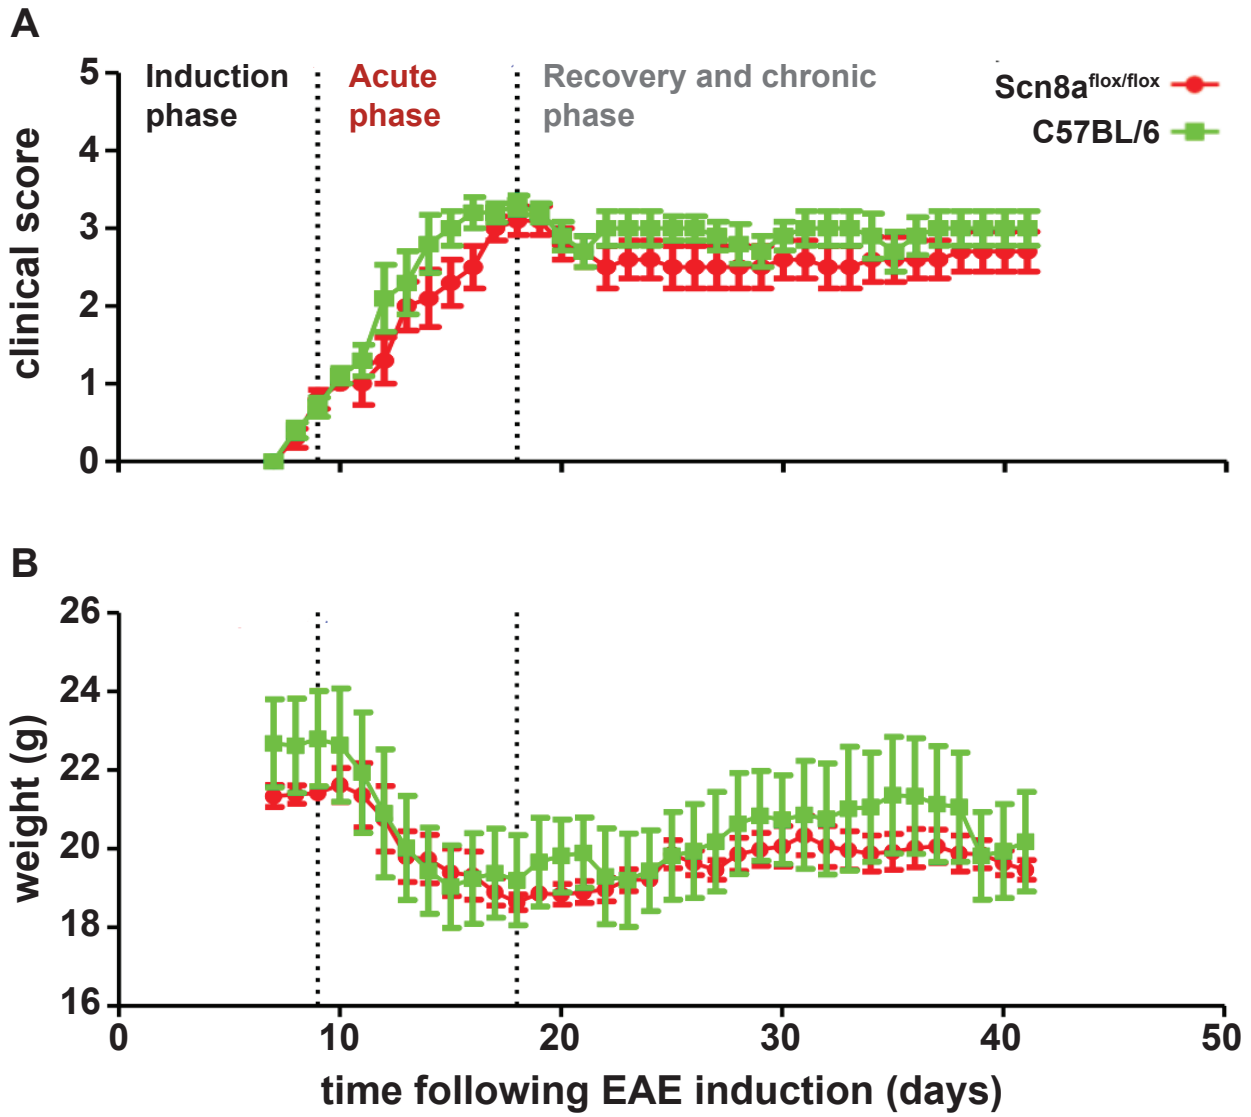

Supplement: MOESM1 [file 17383366]
